# Supplementary material
Source: PubMed Central journal article supplement (PMC1618116)
Supplement: 7601352s1.pdf [file 7601352s1.pdf]

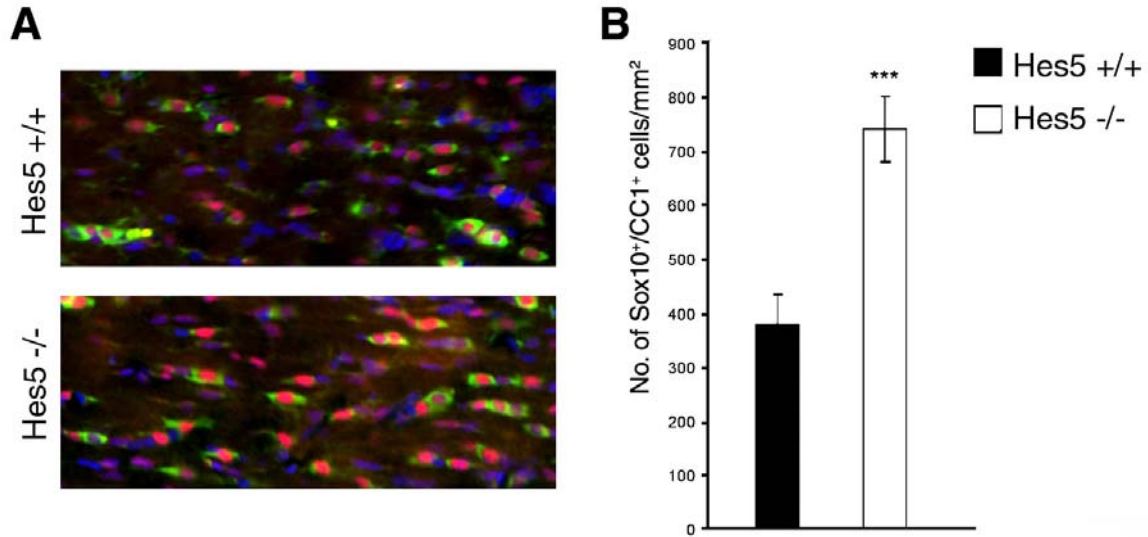

**Supplementary Figure 1: Loss of Hes5 function in vivo results in increased number of mature oligodendrocytes in the postnatal brain.** Immunohistochemistry of coronal brain cryosections from p11 wt (Hes5 +/+) and mutant (Hes5<sup>-/-</sup>) mice and stained with antibodies against the oligodendrocyte markers APC, recognized by the antibody CC1 (green in A) and against the transcription factor Sox10 (red in A). DAPI (blue in A) was used as nuclear counterstain. Mature oligodendrocytes were identified by double immunofluorescence for Sox10 and CC1 (A). The number of mature cells was counted in the medial corpus callosum of wild type and Hes5 mutant sections at the same anatomical level and was then normalized per unit surface area. The bar graphs represent the average and standard error of cell counts from at least three section per mouse and at least three mice per genotype (B). Note that the increased number of cells in Hes5 mutants compared to wild type mice was statistically significant (\* = $p < 0.05$ , \*\*\* = $p < 0.0005$ ). Scale bar=50  $\mu\text{m}$ .

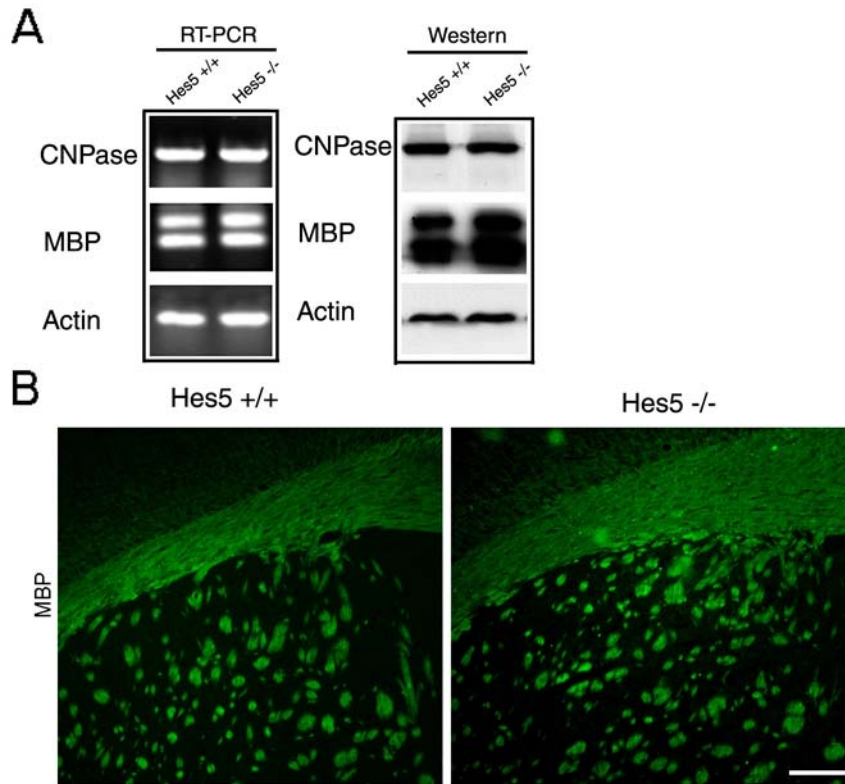

**Supplementary Figure 2: The increased expression of myelin gene transcripts observed in the brain of developing *Hes5*<sup>-/-</sup> mice is a transient phenomenon and does not persist in adult mice.** The levels of myelin gene products were measured in the brain of young adult wild type (*Hes5*<sup>+/+</sup>) and knockout (*Hes5*<sup>-/-</sup>) mice. Note that similar transcript levels for the myelin genes CNPase and MBP were detected by RT-PCR in wild type and *Hes5* mutants. Actin was used as internal control (A). Protein levels were measured using western blot analysis of extracts from the brain of mice of each genotype and revealed similar levels of CNP and slightly elevated levels of MBP in the mutants (B). Immunohistochemistry using MBP antibodies revealed a similar intensity of staining of myelinated fibers in mice of both genotypes (C).

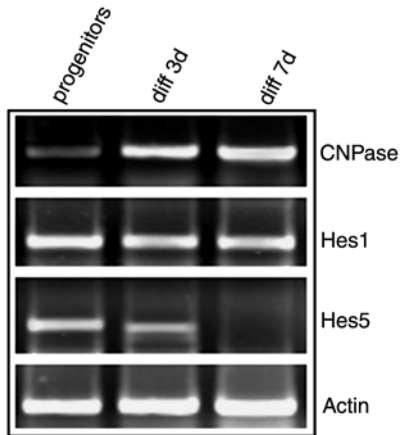

**Supplementary Figure 3: Hes5 expression levels decrease during the differentiation of Oli-Neu cells and are inversely correlated with the levels of myelin genes.** RT-PCR of RNA samples isolated from mouse immortalized oligodendrocyte progenitors (i.e. Oli-Neu cells) and amplified with primers specific for the murine (i.e. endogenous) Hes1, Hes5 and for the myelin gene product CNPase. Note the high levels of Hes5 in undifferentiated progenitor cells, their progressive decline in cells differentiated for 3 and 7 day, and the corresponding increase in myelin gene products (i.e. CNPase). The levels of Hes1 were only subtly decreased during differentiation. Actin was used as internal control.

Primers used in RT-PCR

| name                                | forward               | reverse                 |
|-------------------------------------|-----------------------|-------------------------|
| Actin                               | TGGAATCCTGTGGCATCC    | TCGTAATCCTGCTTGCTG      |
| Mash1                               | CTTCCTTAAGGCCTCTGGCT  | GAACCCGCCATAGAGTTCAA    |
| Id1                                 | CTCAGGATCATGAAGGTCGC  | AGACTCCGAGTTCAGCTCCA    |
| Id2                                 | TCTCCTCCTACGAGCAGCAT  | ATTCAGATGCCTGCAAGGAC    |
| Id3                                 | AACGTAGCCTGGCCATTG    | GTCAGTGGCAAAGCTCCTC     |
| Id4                                 | TGCAGTGCATATGAACGAC   | CAGCTCAGCGGCAGAGAAT     |
| Sox10                               | GACCAGTACCCTCACCTCCA  | CCCCTCTAAGGTCGGGATAG    |
| Olig1                               | ATGAGCTGGTGGGTACAGG   | CACCAGCTGGGAGAGAGAAC    |
| Olig2                               | CTGGTGTCTAGTCGCCATC   | CACCAGTCGCTTCATCTCCT    |
| Nkx2.2                              | GGGTTTTTCAGTCAAGGACA  | TGTAATGGGCGTTGTAATGC    |
| CNPase                              | AGACTTCTCCGAGGCGTACA  | TCTCTTACCACCTCCTGCT     |
| UDP-ceramide-galactosyl-transferase | GGAGTGCTGTTGGAATAGCAA | GGCAGCCATTCTATGAGCTTA   |
| MBP                                 | ATGGCATCACAGAAGAGACC  | CATGGGAGATCCAGAGCGGC    |
| Mouse Hes1                          | ACACCGGACAAACCAAAGAC  | AGCCACTGGAAGGTGACTACT   |
| Mouse Hes5                          | CAAGGAGAAAAACCGACTGC  | GCTGGAAGTGGTAAAGCAGC    |
| Rat Hes1                            | ACCGGACAAACCAAAGACAG  | GAATGTCTGCCTTCTCCAGC    |
| Rat Hes5                            | GCAGCATTGAGCAGCTGAAAC | TCCTGCAGGCACCACGAGTAA   |
| Pax6                                | AGTTCTTCGCAACCTGGCTA  | ACTTGGACGGGAAGTACTGACAC |
| YY1                                 | GGTGCAGATCAAGACCCTGGA | GTGTGCGCAAATTGAAGTCCA   |
